# Supplementary material for: Preventing Surgery-Induced NK Cell Dysfunction Using Anti-TGF-β Immunotherapeutics
Source: MDPI journal article supplement (doi:10.3390/ijms232314608), 2022-11-23
Supplement: s1 [file s1]

**Supplemental Data:****Supplemental Table S1. Demographics for whole blood samples used to characterized cytokine and activating/inhibitory receptors, phospho-signaling proteins, and intracellular/extracellular IFN $\gamma$ .**

| Category    | Subcategory    | Healthy Donors | Cancer Patients |
|-------------|----------------|----------------|-----------------|
| Total (n)   |                | 42             | 39              |
| Sex         | Male           | 16             | 21              |
|             | Female         | 26             | 18              |
| Patient Age | < 60 years     | 26             | 11              |
|             | 60-69 years    | 9              | 19              |
|             | > 70 years     | 7              | 9               |
| Cancer Type | Prostate       | -              | 11              |
|             | Lung           | -              | 7               |
|             | Colorectal     | -              | 6               |
|             | Renal          | -              | 3               |
|             | Ovarian        | -              | 3               |
|             | Sarcoma        | -              | 3               |
|             | Pancreatic     | -              | 1               |
|             | Parathyroid    | -              | 1               |
|             | Neuroendocrine | -              | 1               |
|             | Endometrial    | -              | 2               |
|             | Duodenal       | -              | 1               |
| Staging     | I              | -              | 14              |
|             | II             | -              | 7               |
|             | III            | -              | 15              |
|             | IV             | -              | 3               |

**Supplemental Table S2. Demographics for healthy CD56<sup>+</sup> donors and healthy/cancer patient plasma used in plasma culture experiments.**

| Category    | Subcategory               | Healthy NK<br>Cell Donors | Healthy<br>Plasma<br>Donors | Cancer Patient<br>Plasma |
|-------------|---------------------------|---------------------------|-----------------------------|--------------------------|
| Total (n)   |                           | 18                        | 27                          | 58                       |
| Sex         | Male                      | 5                         | 12                          | 35                       |
|             | Female                    | 13                        | 14                          | 23                       |
|             | Other                     | -                         | 1                           | -                        |
| Patient Age | < 60 years                | 14                        | 18                          | 15                       |
|             | 60-69 years               | 3                         | 4                           | 24                       |
|             | > 70 years                | 1                         | 5                           | 19                       |
| Cancer Type | Prostate                  | -                         | -                           | 16                       |
|             | Endometrial               | -                         | -                           | 10                       |
|             | Lung                      | -                         | -                           | 8                        |
|             | Sarcoma                   | -                         | -                           | 4                        |
|             | Renal                     | -                         | -                           | 2                        |
|             | Colon                     | -                         | -                           | 3                        |
|             | Pancreatic                | -                         | -                           | 2                        |
|             | Rectal                    | -                         | -                           | 1                        |
|             | Thymoma                   | -                         | -                           | 1                        |
|             | Hepatic                   | -                         | -                           | 2                        |
|             | Gastric                   | -                         | -                           | 2                        |
|             | Duodenal                  | -                         | -                           | 2                        |
|             | Non-cancer                | 17                        | 26                          | 3                        |
|             | Inconclusive<br>pathology | -                         | -                           | 2                        |
| Staging     | I                         | -                         | -                           | 13                       |
|             | II                        | -                         | -                           | 9                        |
|             | III                       | -                         | -                           | 22                       |
|             | IV                        | -                         | -                           | 4                        |
|             | Unknown                   | -                         | -                           | 10                       |

**Supplemental Table S3. Demographics for patient platelet-free plasma used to quantify extracellular TGF $\beta$ .**

| Category    | Subcategory | Cancer Patient Plasma |
|-------------|-------------|-----------------------|
| Total (n)   |             | 25                    |
| Sex         | Male        | 17                    |
|             | Female      | 8                     |
| Patient Age | < 60 years  | 5                     |
|             | 60-69 years | 14                    |
|             | > 70 years  | 6                     |
| Cancer Type | Prostate    | 8                     |
|             | Lung        | 6                     |
|             | Sarcoma     | 2                     |
|             | Renal       | 2                     |
|             | Endometrial | 2                     |
|             | Colon       | 2                     |
|             | Hepatic     | 1                     |
|             | Thymoma     | 1                     |
|             | Breast      | 1                     |
| Staging     | I           | 8                     |
|             | II          | 5                     |
|             | III         | 8                     |
|             | IV          | -                     |
|             | Unknown     | 4                     |

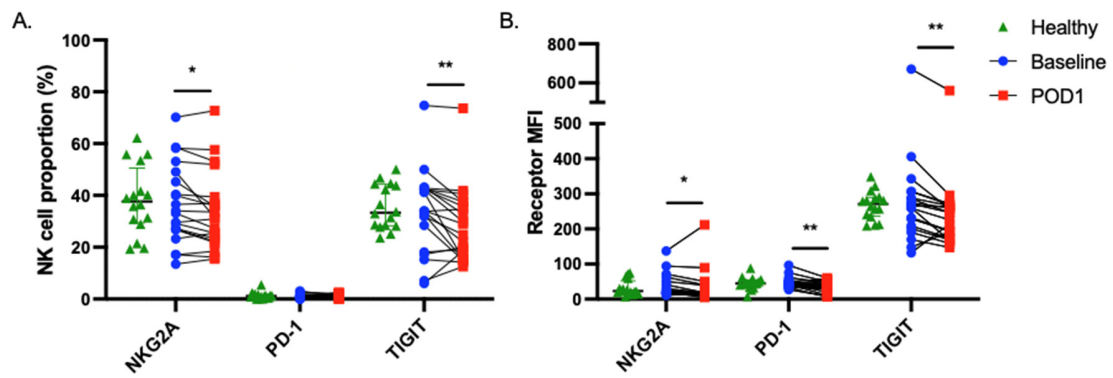

**Supplemental Figure S1. Whole blood samples reveal changes in inhibitory receptors on POD1.** Expression NKG2A (% and MFI), PD-1 (MFI), and TIGIT (% and MFI) were significantly changed on POD1 (A (%)/B (MFI)). (#p<0.1, \*p<0.05, \*\*p<0.005, \*\*\*p<0.0005, \*\*\*\*p<0.00005)
